# Supplementary material for: Genome-Wide Identification of Chitinase Genes in Thalassiosira Pseudonana and Analysis of Their Expression Under Abiotic Stresses
Source: Research Square preprint supplement (doi:10.21203/rs.3.rs-105434/v1), 2020-11-17
Supplement: Supplementary file 1 [file 005359dc4ab4f64ed356fe84.xlsx]

## Sheet: Sheet1
Table S4. The information of chitinase genes from T. weissflogii
Name	MMETSP ID
TwChi1	>D2_CAMPEP_0171354950_/_Thalassiosira_weissflogii,_Strain_CCMP1336_/
TwChi2	>D2_CAMPEP_0171354208_/_Thalassiosira_weissflogii,_Strain_CCMP1336_/
TwChi3	>D2_CAMPEP_0171357378_/_Thalassiosira_weissflogii,_Strain_CCMP1336_/
TwChi4	>D2_CAMPEP_0171354884_/_Thalassiosira_weissflogii,_Strain_CCMP1336_/
TwChi5	>D2_CAMPEP_0171357502_/_Thalassiosira_weissflogii,_Strain_CCMP1336_/
TwChi6	>D2_CAMPEP_0171358492_/_Thalassiosira_weissflogii,_Strain_CCMP1336_/
TwChi7	>D2_CAMPEP_0171357236_/_Thalassiosira_weissflogii,_Strain_CCMP1336_/
TwChi8	>D2_CAMPEP_0171329452_/_Thalassiosira_weissflogii,_Strain_CCMP1336_/
TwChi9	>D2_CAMPEP_0171339346_/_Thalassiosira_weissflogii,_Strain_CCMP1336_/
TwChi10	>D2_CAMPEP_0171333438_/_Thalassiosira_weissflogii,_Strain_CCMP1336_/
TwChi11	>D2_CAMPEP_0171328286_/_Thalassiosira_weissflogii,_Strain_CCMP1336_/
TwChi12	>D2_CAMPEP_0171334486_/_Thalassiosira_weissflogii,_Strain_CCMP1336_/
TwChi13	>D2_CAMPEP_0171338486_/_Thalassiosira_weissflogii,_Strain_CCMP1336_/
TwChi14	>D2_CAMPEP_0171337456_/_Thalassiosira_weissflogii,_Strain_CCMP1336_/
TwChi15	>D2_CAMPEP_0171328788_/_Thalassiosira_weissflogii,_Strain_CCMP1336_/
TwChi16	>D2_CAMPEP_0171332334_/_Thalassiosira_weissflogii,_Strain_CCMP1336_/
TwChi17	>D2_CAMPEP_0171344292_/_Thalassiosira_weissflogii,_Strain_CCMP1336_/
TwChi18	>D2_CAMPEP_0171332554_/_Thalassiosira_weissflogii,_Strain_CCMP1336_/
TwChi19	>D2_CAMPEP_0171332156_/_Thalassiosira_weissflogii,_Strain_CCMP1336_/
TwChi20	>D2_CAMPEP_0171338464_/_Thalassiosira_weissflogii,_Strain_CCMP1336_/
TwChi21	>D2_CAMPEP_0171366708_/_Thalassiosira_weissflogii,_Strain_CCMP1336_/
TwChi22	>D2_CAMPEP_0171368594_/_Thalassiosira_weissflogii,_Strain_CCMP1336_/
TwChi23	>D2_CAMPEP_0171361842_/_Thalassiosira_weissflogii,_Strain_CCMP1336_/
TwChi24	>D2_CAMPEP_0171365250_/_Thalassiosira_weissflogii,_Strain_CCMP1336_/
TwChi25	>D2_CAMPEP_0171365788_/_Thalassiosira_weissflogii,_Strain_CCMP1336_/
TwChi26	>D2_CAMPEP_0171365536_/_Thalassiosira_weissflogii,_Strain_CCMP1336_/
TwChi27	>D2_CAMPEP_0171363420_/_Thalassiosira_weissflogii,_Strain_CCMP1336_/
TwChi28	>D2_CAMPEP_0171362536_/_Thalassiosira_weissflogii,_Strain_CCMP1336_/
TwChi29	>D2_CAMPEP_0171362314_/_Thalassiosira_weissflogii,_Strain_CCMP1336_/
TwChi30	>D2_CAMPEP_0171369540_/_Thalassiosira_weissflogii,_Strain_CCMP1336_/
TwChi31	>D2_CAMPEP_0171361940_/_Thalassiosira_weissflogii,_Strain_CCMP1336_/
TwChi32	>D2_CAMPEP_0171362214_/_Thalassiosira_weissflogii,_Strain_CCMP1336_/
TwChi33	>D2_CAMPEP_0171365392_/_Thalassiosira_weissflogii,_Strain_CCMP1336_/
TwChi34	>D2_CAMPEP_0171374854_/_Thalassiosira_weissflogii,_Strain_CCMP1336_/
TwChi35	>D2_CAMPEP_0171388618_/_Thalassiosira_weissflogii,_Strain_CCMP1336_/
TwChi36	>D2_CAMPEP_0171381528_/_Thalassiosira_weissflogii,_Strain_CCMP1336_/
TwChi37	>D2_CAMPEP_0171389160_/_Thalassiosira_weissflogii,_Strain_CCMP1336_/
TwChi38	>D2_CAMPEP_0171386160_/_Thalassiosira_weissflogii,_Strain_CCMP1336_/
TwChi39	>D2_CAMPEP_0171387896_/_Thalassiosira_weissflogii,_Strain_CCMP1336_/
TwChi40	>D2_CAMPEP_0171380706_/_Thalassiosira_weissflogii,_Strain_CCMP1336_/
TwChi41	>D2_CAMPEP_0171412352_/_Thalassiosira_weissflogii,_Strain_CCMP1336_/
TwChi42	>D2_CAMPEP_0171418414_/_Thalassiosira_weissflogii,_Strain_CCMP1336_/
TwChi43	>D2_CAMPEP_0171420202_/_Thalassiosira_weissflogii,_Strain_CCMP1336_/
TwChi44	>D2_CAMPEP_0171390392_/_Thalassiosira_weissflogii,_Strain_CCMP1336_/
TwChi45	>D2_CAMPEP_0171394170_/_Thalassiosira_weissflogii,_Strain_CCMP1336_/
TwChi46	>D2_CAMPEP_0171396494_/_Thalassiosira_weissflogii,_Strain_CCMP1336_/
TwChi47	>D2_CAMPEP_0171390686_/_Thalassiosira_weissflogii,_Strain_CCMP1336_/
TwChi48	>D2_CAMPEP_0171393784_/_Thalassiosira_weissflogii,_Strain_CCMP1336_/
TwChi49	>D2_CAMPEP_0171399230_/_Thalassiosira_weissflogii,_Strain_CCMP1336_/
TwChi50	>D2_CAMPEP_0171414416_/_Thalassiosira_weissflogii,_Strain_CCMP1336_/
TwChi51	>D2_CAMPEP_0171406660_/_Thalassiosira_weissflogii,_Strain_CCMP1336_/
TwChi52	>D2_CAMPEP_0171391040_/_Thalassiosira_weissflogii,_Strain_CCMP1336_/
TwChi53	>D2_CAMPEP_0171411692_/_Thalassiosira_weissflogii,_Strain_CCMP1336_/
TwChi54	>D2_CAMPEP_0171397266_/_Thalassiosira_weissflogii,_Strain_CCMP1336_/
TwChi55	>D2_CAMPEP_0171392750_/_Thalassiosira_weissflogii,_Strain_CCMP1336_/
TwChi56	>D2_CAMPEP_0171394432_/_Thalassiosira_weissflogii,_Strain_CCMP1336_/
TwChi57	>D2_CAMPEP_0171399604_/_Thalassiosira_weissflogii,_Strain_CCMP1336_/
TwChi58	>D2_CAMPEP_0171393486_/_Thalassiosira_weissflogii,_Strain_CCMP1336_/
TwChi59	>D2_CAMPEP_0171450438_/_Thalassiosira_weissflogii,_Strain_CCMP1336_/
TwChi60	>D2_CAMPEP_0171443550_/_Thalassiosira_weissflogii,_Strain_CCMP1336_/
TwChi61	>D2_CAMPEP_0171447906_/_Thalassiosira_weissflogii,_Strain_CCMP1336_/
TwChi62	>D2_CAMPEP_0171447902_/_Thalassiosira_weissflogii,_Strain_CCMP1336_/
TwChi63	>D2_CAMPEP_0171435908_/_Thalassiosira_weissflogii,_Strain_CCMP1336_/
TwChi64	>D2_CAMPEP_0171444756_/_Thalassiosira_weissflogii,_Strain_CCMP1336_/
TwChi65	>D2_CAMPEP_0171450348_/_Thalassiosira_weissflogii,_Strain_CCMP1336_/
TwChi66	>D2_CAMPEP_0171448670_/_Thalassiosira_weissflogii,_Strain_CCMP1336_/
TwChi67	>D2_CAMPEP_0171429496_/_Thalassiosira_weissflogii,_Strain_CCMP1336_/
TwChi68	>D2_CAMPEP_0171427446_/_Thalassiosira_weissflogii,_Strain_CCMP1336_/
TwChi69	>D2_CAMPEP_0171421810_/_Thalassiosira_weissflogii,_Strain_CCMP1336_/
TwChi70	>D2_CAMPEP_0171435988_/_Thalassiosira_weissflogii,_Strain_CCMP1336_/
TwChi71	>D2_CAMPEP_0171422912_/_Thalassiosira_weissflogii,_Strain_CCMP1336_/
TwChi72	>D2_CAMPEP_0171421496_/_Thalassiosira_weissflogii,_Strain_CCMP1336_/
TwChi73	>D2_CAMPEP_0171426026_/_Thalassiosira_weissflogii,_Strain_CCMP1336_/
TwChi74	>D2_CAMPEP_0171434032_/_Thalassiosira_weissflogii,_Strain_CCMP1336_/
TwChi75	>D2_CAMPEP_0171423838_/_Thalassiosira_weissflogii,_Strain_CCMP1336_/
TwChi76	>D2_CAMPEP_0171428148_/_Thalassiosira_weissflogii,_Strain_CCMP1336_/
