# Supplementary material for: Genome-Wide Identification of Chitinase Genes in Thalassiosira Pseudonana and Analysis of Their Expression Under Abiotic Stresses
Source: Research Square preprint supplement (doi:10.21203/rs.3.rs-105434/v1), 2020-11-17
Supplement: Supplementary file 2 [file c56fd3726e49c8c7464379d4.xlsx]

## Sheet: Sheet1
Table S7. List of the putative motifs of the T. pseudonana chitinase proteins
Motif	Width	Best possible match
1	42	FPAMAADPAARKKFAKSCVDLJETYGFDGIDJDWEYPGYREH
2	57	GYYASWQWYDRNKLAKPANLDFTKVTRVNFAFFQTBEKGBIWGTDSWADPNLLFGPY
3	25	IDIVGLASYLTEFNLMTYDFHGSWD
4	42	QGEGSKGFSVDGCVRNWLAGGGSRDKINIGLPFYGRSFAGAT
5	29	GLVSYDDEEAICDKTQYAMENCLNGYIIW
6	41	GPDEITWYLDEGTPQYYNIVEKLPEMISVRDEKTKTQYAYN
7	28	TPDDTENYVLLLKEIREALDELGEQTGL
8	27	CAYHQYEEGLIYLAHAAGAEVYPSIGG
9	29	ELSGDLLEDLSTPLLDAVNAKLNBPSLDC
10	65	FGGTLNNINGGLECPAYPGGWHGEAVKLRLNRYCKAATALGVDKLLKLDGCKGLKTAFEECLEDG
11	42	HAEKIFMMGSLDQRKKELAAFLGHTLHESDEFKAGREYLACA
12	57	LGIPRSKLVLGLAAYGRSYTLSDSKCTTAGCPIEGAGLTGCEGEPGFLPYFEJADFM
13	41	NYNYIAASLALTGDANTFCSNPDLVATEPSYAWGVGIYFWM
14	38	GEVPTQACFDSHPLTFISDELYGAPPDPNHPERAYVAP
15	15	YYGLTAALPCGPSHI
16	27	YKEFNSVKDRNPDLKTLIAVGGWTFBQ
17	21	LEGYVKANSVFFGRGAIQLSW
18	26	DVDKFGYTHLVYSFAGISSSGYLEAW
19	34	PCDLLTZDVFNAJAPEATAPYTYVGLCDAIDDYN
20	39	HYFCGTDWTDANSQCGTPCPSGSSEECPDGQTCFAFTTC
